# Supplementary material for: Proteolytic Vesicles Derived from Salmonella enterica Serovar Typhimurium-Infected Macrophages: Enhancing MMP-9-Mediated Invasion and EV Accumulation
Source: MDPI journal article supplement (doi:10.3390/biomedicines12020434), 2024-02-15
Supplement: s1 [file s1]

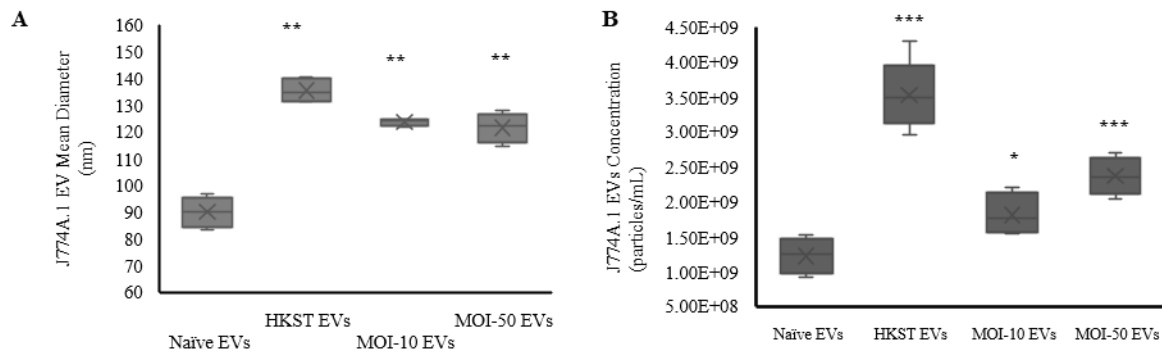

**Supplemental Figure S1. Characterization of an *in vitro* model of macrophage-derived EVs.** (A) Quantitative analysis of the mean diameters of macrophage-derived from naïve cells, cells exposed to heat-killed *S. Typhimurium* (HKST), or live *S. Typhimurium* at a MOI of 10 or 50, measured by nanoparticle tracking analysis (NTA). Each experiment was done in triplicates. (B) Quantitative analysis of macrophage-derived particle concentrations measured by NTA, showing the mean and error. EVs were collected from the same cells amount for each condition, and each experiment was conducted in triplicate.

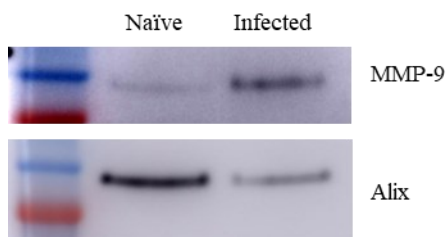

**Supplemental Figure S2. Validation of MMP-9 EV association via precipitation out of 20% sucrose cushion.** Representative Western blots of MMP-9 and Alix from EVs derived from naïve and *S. Typhimurium*-infected macrophages precipitated out of a 20% sucrose cushion.

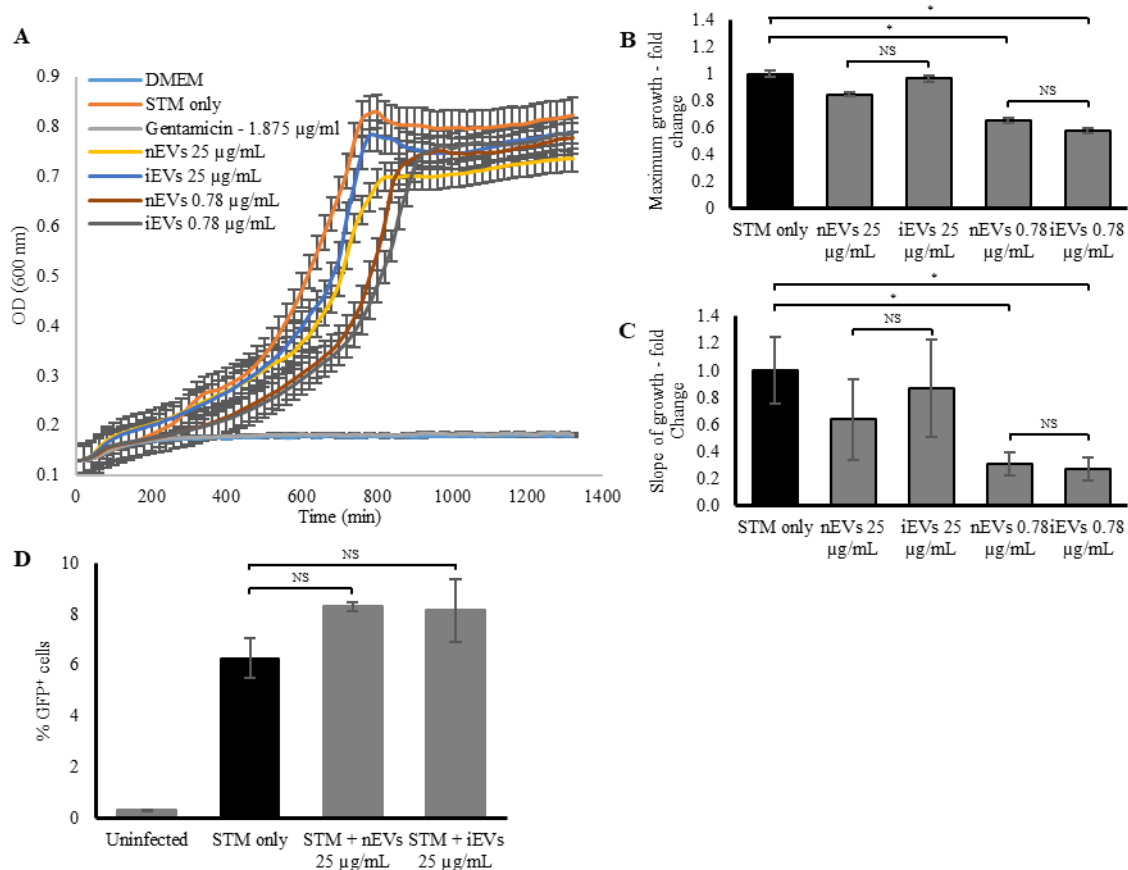

**Supplemental Figure S3. *S. Typhimurium*-infected macrophage-derived EVs do not affect bacterial growth or infectivity.** (A) Comparison of the growth curves of *S. Typhimurium* incubated with the highest dose (25 µg/mL) and low dose (0.78 µg/mL) of nEVs and iEVs. (B) Fold change of the maximum growth and (C) the maximum slope of growth of *S. Typhimurium* incubated with 25 and 0.78 µg/mL nEVs and iEVs, normalized to STM only. (D) Percentage of *S. Typhimurium*-infected Caco-2 epithelial cells pretreated with 25 µg/mL nEVs or iEVs. Each experiment was done in triplicates.

| Protein names                                                                                                            | Gene names | Log2 FC MMP9/IgG | Matrisome Category |
|--------------------------------------------------------------------------------------------------------------------------|------------|------------------|--------------------|
| Coiled-coil domain-containing protein 40                                                                                 | Ccdc40     | 13.42            |                    |
| Matrix metalloproteinase-9                                                                                               | Mmp9       | 12.87            | ECM Regulators     |
| 40S ribosomal protein S13                                                                                                | Rps13      | 8.23             |                    |
| EMILIN-2                                                                                                                 | Emilin2    | 8.05             | ECM Glycoproteins  |
| Ig mu chain C region                                                                                                     | Ighm       | 8.03             |                    |
| Macrophage metalloelastase                                                                                               | Mmp12      | 7.83             | ECM Regulators     |
| Protein transport protein Sec31B                                                                                         | Sec31b     | 7.66             |                    |
| Plasminogen;Plasmin heavy chain A;Activation peptide;Angiostatin;Plasmin heavy chain A, short form;Plasmin light chain B | Plg        | 7.43             | ECM Regulators     |
| Fibronectin;Anastellin                                                                                                   | Fn1        | 7.16             | ECM Glycoproteins  |
| 40S ribosomal protein S25                                                                                                | Rps25      | 6.70             |                    |
| Programmed cell death 6-interacting protein                                                                              | Pdcd6ip    | 6.49             |                    |
| 60S ribosomal protein L17                                                                                                | Rpl17      | 5.93             |                    |

|                                                                                                                                                                                                                                                                     |        |      |                         |
|---------------------------------------------------------------------------------------------------------------------------------------------------------------------------------------------------------------------------------------------------------------------|--------|------|-------------------------|
| 40S ribosomal protein S19                                                                                                                                                                                                                                           | Rps19  | 5.91 |                         |
| Annexin A2;Annexin                                                                                                                                                                                                                                                  | Anxa2  | 5.88 | ECM-affiliated Proteins |
| 60S ribosomal protein L4                                                                                                                                                                                                                                            | Rpl4   | 5.78 |                         |
| RNA-binding protein with serine-rich domain 1                                                                                                                                                                                                                       | Rnps1  | 5.67 |                         |
| 40S ribosomal protein S20                                                                                                                                                                                                                                           | Rps20  | 5.51 |                         |
| 60S ribosomal protein L24                                                                                                                                                                                                                                           | Rpl24  | 5.50 |                         |
| 40S ribosomal protein S11                                                                                                                                                                                                                                           | Rps11  | 5.49 |                         |
| 60S ribosomal protein L27a                                                                                                                                                                                                                                          | Rpl27a | 5.22 |                         |
| T-complex protein 1 subunit beta                                                                                                                                                                                                                                    | Cct2   | 5.01 |                         |
| Pro-low-density lipoprotein receptor-related protein 1;Low-density lipoprotein receptor-related protein 1 85 kDa subunit;Low-density lipoprotein receptor-related protein 1 515 kDa subunit;Low-density lipoprotein receptor-related protein 1 intracellular domain | Lrp1   | 5.01 |                         |
| 60S ribosomal protein L9                                                                                                                                                                                                                                            | Rpl9   | 4.79 |                         |
| Complement C4-B;Complement C4 beta chain;Complement C4 alpha chain;C4a anaphylatoxin;Complement C4 gamma chain                                                                                                                                                      | C4b    | 4.73 |                         |
| 60S ribosomal protein L21                                                                                                                                                                                                                                           | Rpl21  | 4.68 |                         |
| 40S ribosomal protein SA                                                                                                                                                                                                                                            | Rpsa   | 4.61 |                         |
| 60S ribosomal protein L28                                                                                                                                                                                                                                           | Rpl28  | 4.43 |                         |
| Otopetrin-2                                                                                                                                                                                                                                                         | Otop2  | 4.42 |                         |
| Desmoplakin                                                                                                                                                                                                                                                         | Dsp    | 4.41 |                         |
| 40S ribosomal protein S4, X isoform;40S ribosomal protein S4                                                                                                                                                                                                        | Rps4x  | 4.40 |                         |
| Junction plakoglobin                                                                                                                                                                                                                                                | Jup    | 4.26 |                         |
| Serine/arginine-rich splicing factor 7                                                                                                                                                                                                                              | Srsf7  | 4.21 |                         |
| Uridine phosphorylase 2;Uridine phosphorylase                                                                                                                                                                                                                       | Upp2   | 4.13 |                         |
| 40S ribosomal protein S23                                                                                                                                                                                                                                           | Rps23  | 4.12 |                         |
| Annexin A1;Annexin                                                                                                                                                                                                                                                  | Anxa1  | 4.11 | ECM-affiliated Proteins |
| Clathrin heavy chain 1;Clathrin heavy chain                                                                                                                                                                                                                         | Cltc   | 4.06 |                         |
| 40S ribosomal protein S9                                                                                                                                                                                                                                            | Rps9   | 4.02 |                         |
| Lysozyme;Lysozyme C-1                                                                                                                                                                                                                                               | Lyz1   | 4.00 |                         |

**Supplemental Table S1. Protein-protein interactions of EV-associated MMP-9.** EV lysates were used for immunoprecipitation using antibodies against MMP-9 or IgG. The immune complexes were subjected to mass spectrometry analysis. Interacting proteins showing log2 ratio >4 in MMP9 compared to IgG are presented.
